# Supplementary material for: HIF-1α expression and high microvessel density are characteristic features in serrated colorectal cancer
Source: Springer Nature journal article supplement (doi:10.1007/s00428-016-1988-8), 2016-07-15
Supplement: MOESM5 [file 10495994]

**Supplementary table 5.** Association between MVD at the invasive front and clinicopathological factors

|  | |  | **All CRC (n =81)** | | | **SAC (n =42)** | | |  | | **CC (n=39)** | |  | |
| --- | --- | --- | --- | --- | --- | --- | --- | --- | --- | --- | --- | --- | --- | --- |
|  | |  | n | MVD  median (IQR) | *P*-value | n | MVD  median (IQR) | *P*-value | n | | MVD median (IQR) | | *P*-value | |
| **Gender** | |  |  |  |  |  |  |  |  | |  | |  | |
|  | | Male | 42 | 12.0 (7.0-25.0) |  | 25 | 17.0 (10.0-30.0) |  | 17 | | 7.0 (3.0-13.5) | |  | |
|  | | Female | 39 | 12.0 (5.0-22.0) | 0.656 | 17 | 20.0 (11.0-30.0) | 0.517 | 22 | | 8.0 (4.0-16.3) | | 0.578 | |
| **Age** | |  |  |  |  |  |  |  |  | |  | |  | |
|  | | <65 | 22 | 11.0 (5.8-17.3) |  | 10 | 12.0 (9.5-19.8) |  | 12 | | 7.5 (2.8-17.3) | |  | |
|  | | ≥65 | 59 | 13.0 (6.0-25.0) | 0.267 | 32 | 24.0 (10.5-30.0) | 0.198 | 27 | | 8.0 (4.0-14.0) | | 0.970 | |
| **Tumor location** | | |  |  |  |  |  |  |  | |  | |  | |
|  | Proximal colon | | 42 | 10.0 (5.5-23.5) |  | 22 | 21.5 (10.0-30.5) |  | 20 | | 8.5 (3.3-12.3) | |  | |
|  | Distal colon | | 26 | 15.0 (9.5-25.0) |  | 14 | 18.5 (11.5-28.5) |  | 12 | | 13.0 (4.8-18.8) | |  | |
|  | Rectum | | 13 | 8.0 (4.5-16.5) | 0.368 | 6 | 15.0 (11.0-27.8) | 0.951 | 7 | | 5.0 (3.0-8.0) | | 0.264 | |
| **WHO grade** | | |  |  |  |  |  |  |  | |  | |  | |
|  | High | | 3 | 10 (10) |  | 3 | 10.0 (10.0-10.0) |  | 0 | |  | |  | |
|  | Low | | 78 | 12.0 (5.8-22.8) | 0.927 | 39 | 20.0 (12.0-30.0) | 0.292 | 39 | | 8.0 (4.0-15.0) | |  | |
| **Dukes’ Stage** | | |  |  |  |  |  |  |  | |  | |  | |
|  | A | | 10 | 11.0 (3.0-30.0) |  | 5 | 30.0 (7.5-32.5) |  | 5 | | 4.0 (3.0-11.5) | |  | |
|  | B | | 32 | 15.0 (8.5-24.5) |  | 16 | 21.5 (10.5-30.0) |  | 16 | | 14.5 (4.5-19.5) | |  | |
|  | C | | 39 | 10.0 (6.0-20.0) | 0.481 | 21 | 15.0 (10.0-29) | 0.853 | 18 | | 7.0 (3.8-10.0) | | 0.145 | |
| Abbreviations: MVD = microvessel density; IQR; interquartile range | | | | | | | | | |  | |  | |  | |
