# Supplementary material for: HIF-1α expression and high microvessel density are characteristic features in serrated colorectal cancer
Source: Springer Nature journal article supplement (doi:10.1007/s00428-016-1988-8), 2016-07-15
Supplement: MOESM6 [file 10495994]

**Supplementary table 6.** Association between MVD at the center of the tumor and clinicopathological factors

|  | |  | **All CRC (n =81)** | | |  | **SAC (n =42)** | | |  |  | **CC (n=39)** |  |
| --- | --- | --- | --- | --- | --- | --- | --- | --- | --- | --- | --- | --- | --- |
|  | |  | n | MVD  median (IQR) | *P*-value |  | n | MVD  median (IQR) | *P*-value |  | n | MVD  median (IQR) | *P*-value |
| **Gender** | |  |  |  |  |  |  |  |  |  |  |  |  |
|  | | Male | 42 | 5.0 (3.0-15.3) |  |  | 25 | 10.0 (4.0-19.0) |  |  | 17 | 4.0 (2.0-5.5) |  |
|  | | Female | 39 | 4.0 (2.0-15.0) | 0.244 |  | 17 | 12.0 (5.5-15.0) | 0.517 |  | 22 | 3.0 (2.0-5.5) | 0.602 |
| **Age** | |  |  |  |  |  |  |  |  |  |  |  |  |
|  | | <65 | 22 | 5.5 (2.0-13.5) |  |  | 10 | 7.0 (4.8-13.5) |  |  | 12 | 3.0 (2.0-13.3) |  |
|  | | ≥65 | 59 | 4.0 (2.0-15.0) | 0.793 |  | 32 | 13.5 (4.0-17.0) | 0.280 |  | 27 | 3.0 (2.0-5.0) | 0.629 |
| **Tumor location** | | |  |  |  |  |  |  |  |  |  |  |  |
|  | Proximal colon | | 43 | 4.5 (2.0-15.0) |  |  | 22 | 11.0 (4.0-20.0) |  |  | 20 | 2.0 (2.0-4.8) |  |
|  | Distal colon | | 26 | 6.0 (4.0-15.0) |  |  | 14 | 11.5 (4.0-15.5) |  |  | 12 | 4.5 (2.0-13.8) |  |
|  | Rectum | | 13 | 4.0 (2.5-11.5) | 0.498 |  | 6 | 11.5 (2.8-14.3) | 0.612 |  | 7 | 4.0 (2.0-4.0) | 0.272 |
| **WHO grade** | | |  |  |  |  |  |  |  |  |  |  |  |
|  | High | | 3 | 10 (7-) |  |  | 3 | 10.0 (7.0-10.0) |  |  | 0 |  |  |
|  | Low | | 78 | 4.0 (2.0-15.0) | 0.427 |  | 39 | 13.0 (4.0-16.0) | 0.737 |  | 39 | 3.0 (2.0-5.0) |  |
| **Dukes’ Stage** | | |  |  |  |  |  |  |  |  |  |  |  |
|  | A | | 10 | 3.5 (2.0-12.5) |  |  | 5 | 12.0 (3.5-17.0) |  |  | 5 | 2.0 (2.0-3.5) |  |
|  | B | | 32 | 6.0 (3.0-15.0) |  |  | 16 | 10.5 (4.0-16.5) |  |  | 16 | 4.5 (2.0-13.8) |  |
|  | C | | 39 | 4.0 (2.0-13.0) | 0.509 |  | 21 | 10.0 (4.0-15.5) | 0.973 |  | 18 | 2.5 (2.0-4.3) | 0.307 |
| Abbreviations: MVD = microvessel density; IQR; interquartile range | | | | | | | | | |  |  |  |  |
